# Supplementary material for: Tubulin detyrosination promotes human trophoblast syncytium formation
Source: PubMed Central journal article supplement — J Mol Cell Biol. 2019 Aug 13;11(11):967–78. doi: 10.1093/jmcb/mjz084 (PMC6927241; doi:10.1093/jmcb/mjz084), 2019-08-13
Supplement: supplemental_materials_mjz084.pdf [file supplemental_materials_mjz084.pdf]

**A**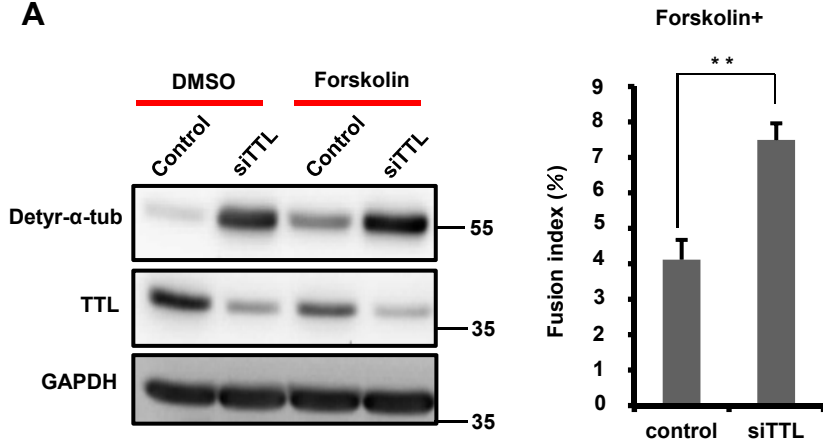**B**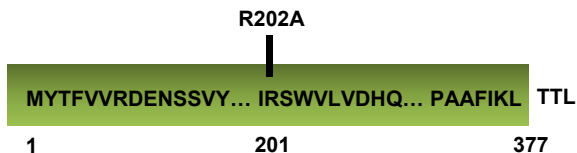

**Figure S1 Human trophoblast syncytialization was negatively regulated by TTL, related to Figure 3 and Figure 4.**

- (A) TTL was transiently knocked down using siRNA in BeWo cells, with or without forskolin treatment for 48 h.  
(B) A schematic diagram of TTL mutant.

**A**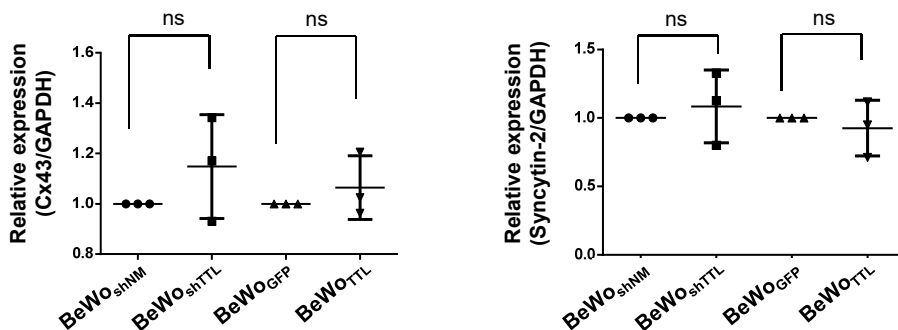**B**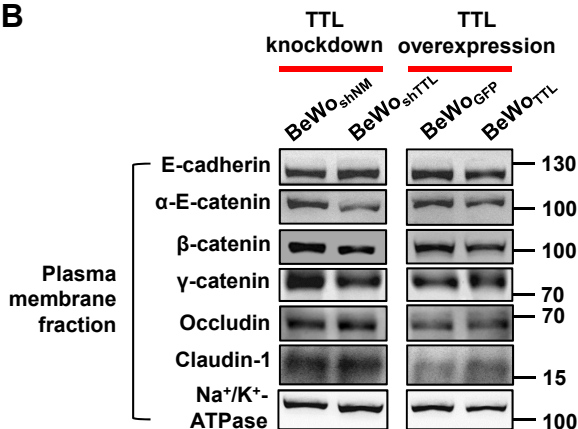

**Figure S2 Expression levels of mRNA and protein of fusion-related cell surface markers, related to Figure 5.**

(A) Realtime PCR analysis of Cx43 and Syncytin-2 expression in BeWo cells with TTL-knockdown or TTL-overexpression upon forskolin treatment. The horizontal lines represent the means. ns, not significant.

(B) The influences of TTL overexpression or knockdown on the expression of cell surface proteins in different cell fractions of BeWo cells treated with forskolin. The cell surface proteins were isolated and examined with the indicated antibodies. Na<sup>+</sup>/K<sup>+</sup>-ATPase served as a plasma membrane loading control.
